# Supplementary material for: Mouse Liver Compensates Loss of Sgpl1 by Secretion of Sphingolipids into Blood and Bile
Source: MDPI journal article supplement (doi:10.3390/ijms221910617), 2021-09-30
Supplement: s1 [file s1]

## Legends to Supplementary Figures

### **Suppl. Figure S1: Basic characteristics of *Sgpl1*<sup>HepKO</sup> mice.**

(A, B) Body weight and liver weight of control and *Sgpl1*<sup>HepKO</sup> mice at the age of 8 weeks (A) and 8 months (B). (C, D) Liver enzymes and (E, F) Blood cell counts. Shown are values from individual mice and their median. M, male mice; F, female mice.

### **Suppl. Figure S2: Levels of glucosylceramides in liver and plasma of *Sgpl1*<sup>HepKO</sup> mice.**

Glucosylceramides were measured by LC-MS/MS in liver and plasma of control and *Sgpl1*<sup>HepKO</sup> mice at the age of 8 months. Shown are values from individual mice and their median. GlcCer, glucosylceramide.

### **Suppl. Figure S3: Levels of sphingomyelins in liver and plasma of *Sgpl1*<sup>HepKO</sup> mice.**

Sphingomyelins (SM) were measured by LC-MS/MS in liver and plasma of control and *Sgpl1*<sup>HepKO</sup> mice at the age of 8 months. Shown are values from individual mice and their median. \* $p < 0.05$  in two-tailed Student's t-test with Welch's correction.

### **Suppl. Figure S4: Levels of dihydro-sphingolipids in liver and plasma of *Sgpl1*<sup>HepKO</sup> mice.**

(A-D) Dihydro-S1P and dihydro-sphingosine were measured by LC-MS/MS in liver and plasma of control and *Sgpl1*<sup>HepKO</sup> mice at the age of 8 weeks (A, B) and 8 months (C, D). (E, F) Dihydro-ceramides levels were measured in liver at the age of 8 weeks (E) and 8 months (F). Shown are values from individual mice and their median. \* $p < 0.05$ , \*\* $p < 0.01$ , \*\*\* $p < 0.001$  in two-tailed Student's t-test with Welch's correction.

### **Suppl. Figure S5: Levels of ceramides in bile of *Sgpl1*<sup>HepKO</sup> mice.**

Ceramide levels were measured by LC-MS/MS in bile of control and *Sgpl1*<sup>HepKO</sup> mice at various ages. Shown are values from individual mice and their median.

### **Suppl. Figure S6: Sterols in liver and plasma of *Sgpl1*<sup>HepKO</sup> mice.**

(A, B) Sterols referred to total cholesterol were measured by gas chromatography-flame ionisation detection in the liver (A) and plasma (B) of control and *Sgpl1*<sup>HepKO</sup> mice at the age of 8 months. Shown are values from individual mice and their median.

### A: Weight, 8-week-olds

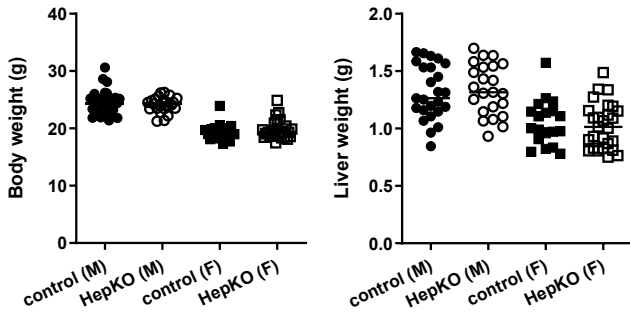

### B: Weight, 8-month-olds

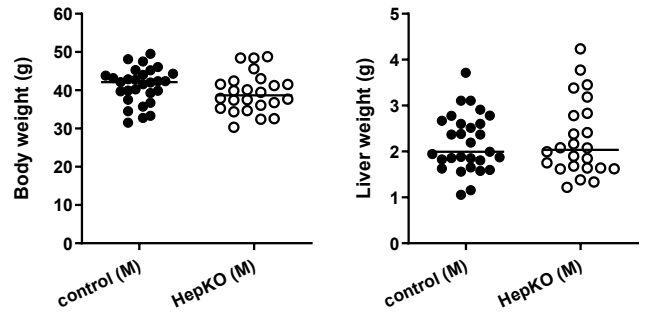

### C: Liver enzymes, 8-week-olds

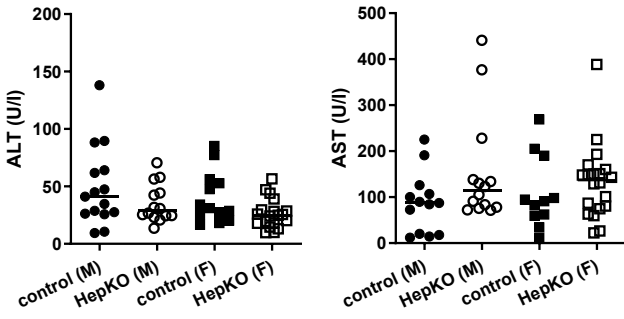

### D: Liver enzymes, 8-month-olds

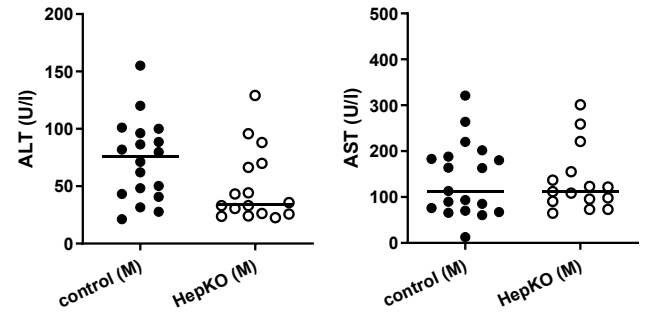

### E: Blood counts, 8-week-olds

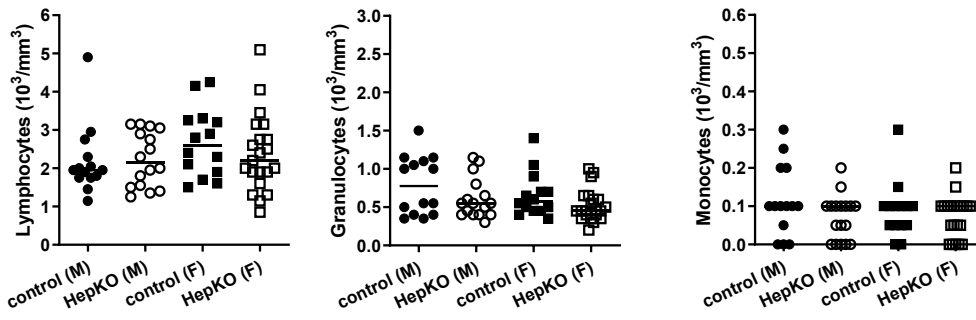

### F: Blood counts, 8-month-olds

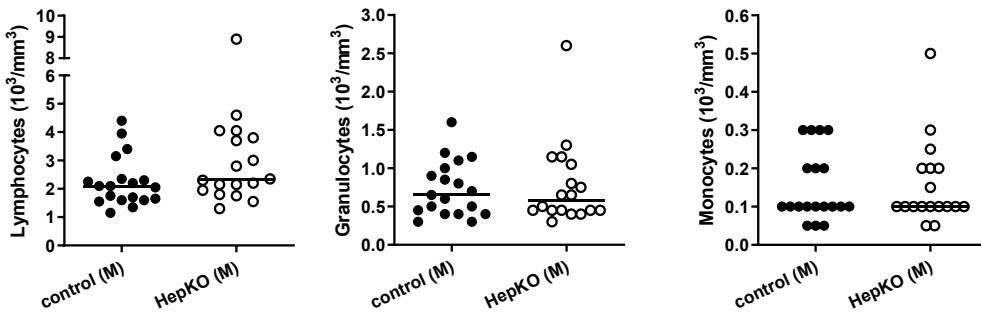

Figure S1

# Glucosylceramides, 8-month-olds

## Liver

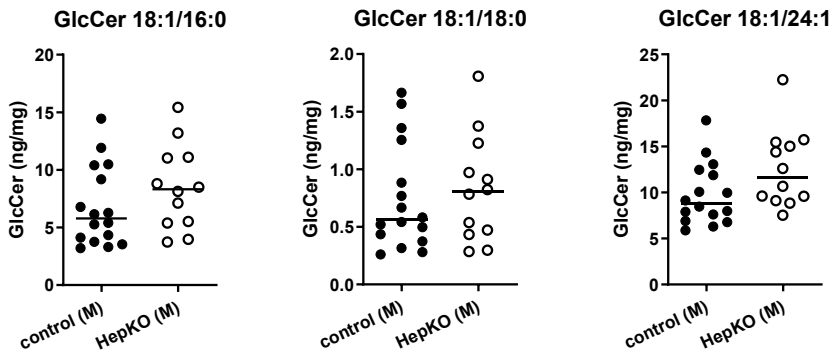

## Plasma

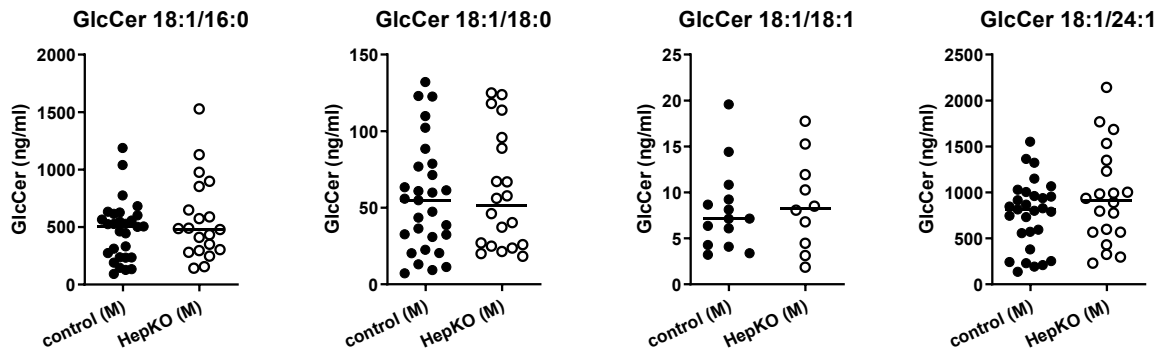

Figure S2

# Sphingomyelin, 8-month-olds

## Liver

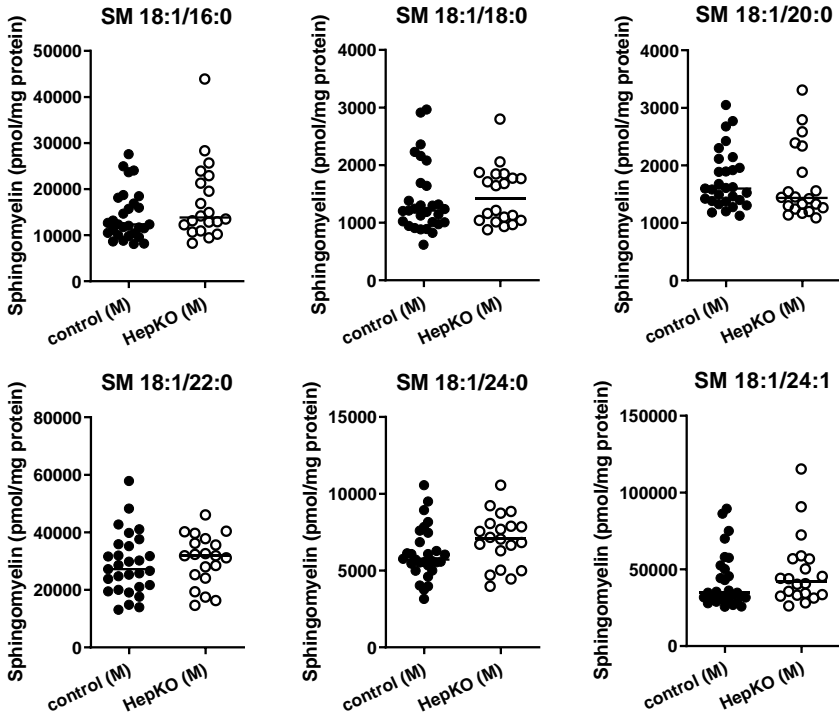

## Plasma

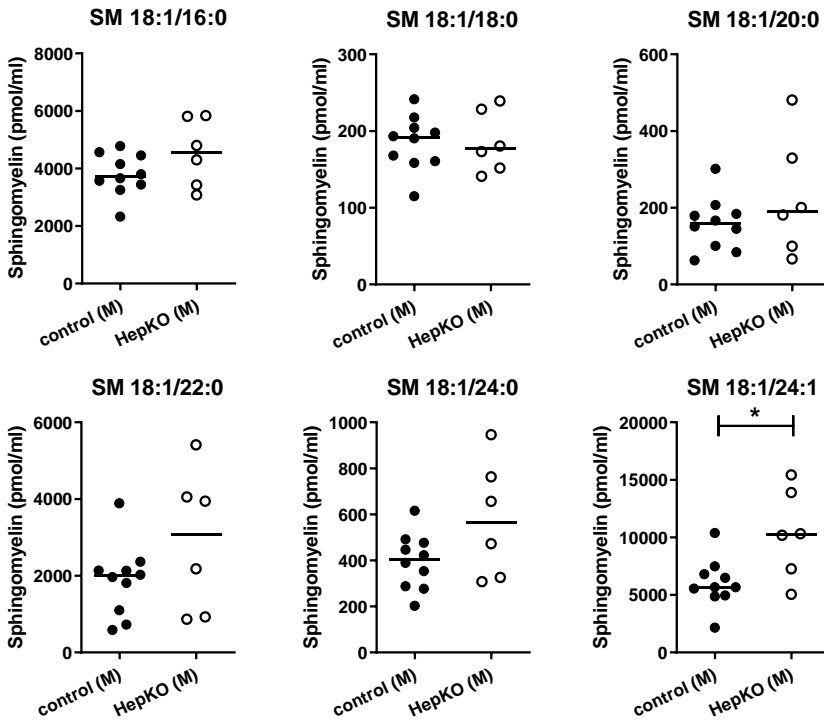

Figure S3

### A: Dihydro-S1P, 8-week-olds

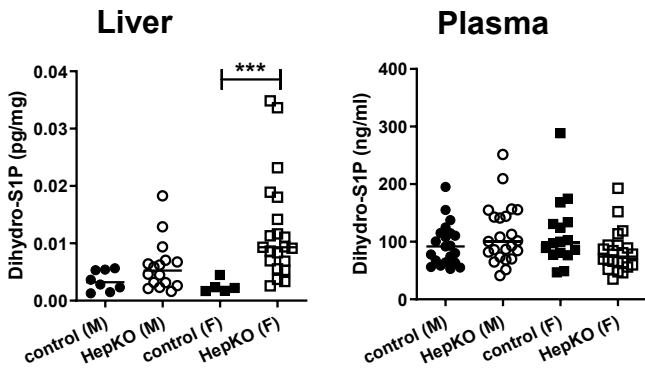

### B: Dihydro-Sph, 8-week-olds

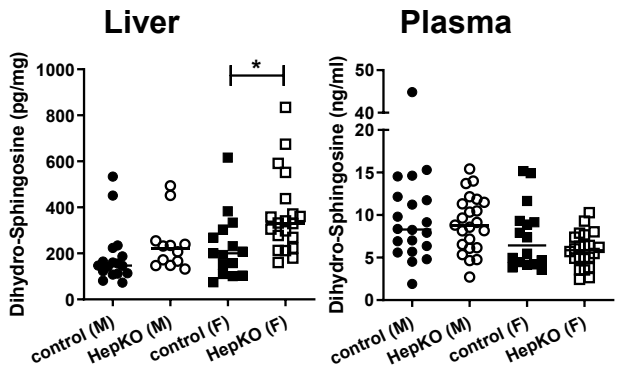

### C: Dihydro-S1P, 8-month-olds

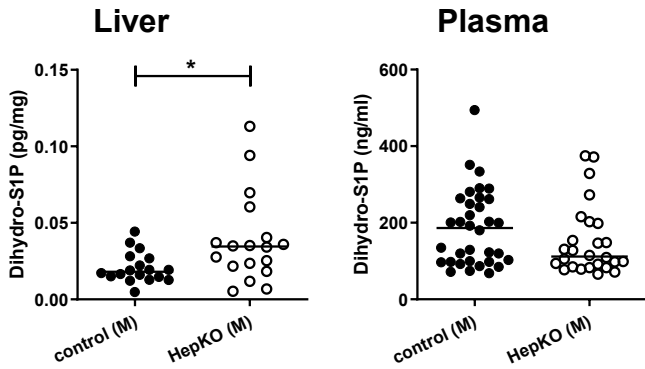

### D: Dihydro-Sph, 8-month-olds

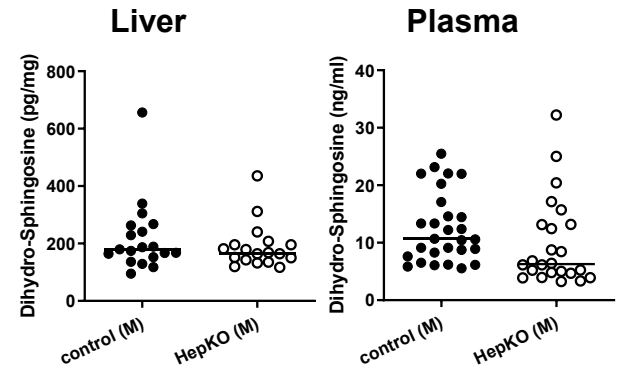

### E: Dihydro-Ceramides, Liver, 8-week-olds

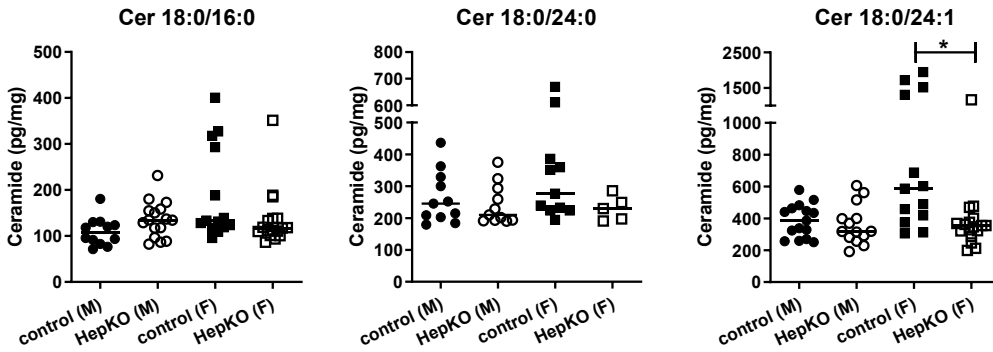

### F: Dihydro-Ceramides, Liver, 8-month-olds

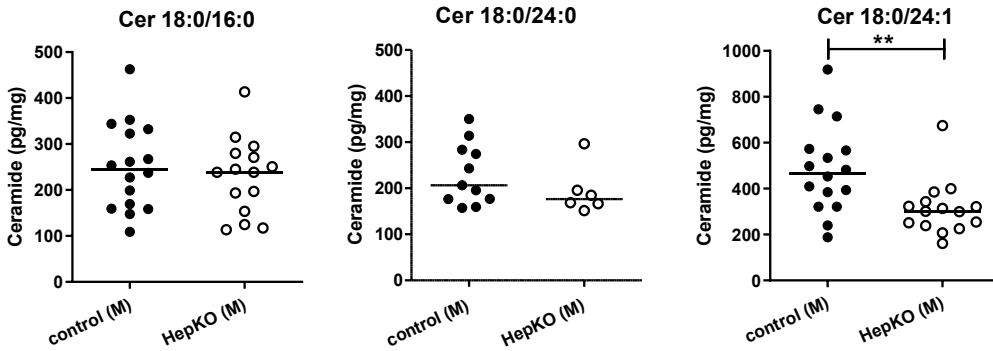

# Ceramides in Bile, 8-month-olds

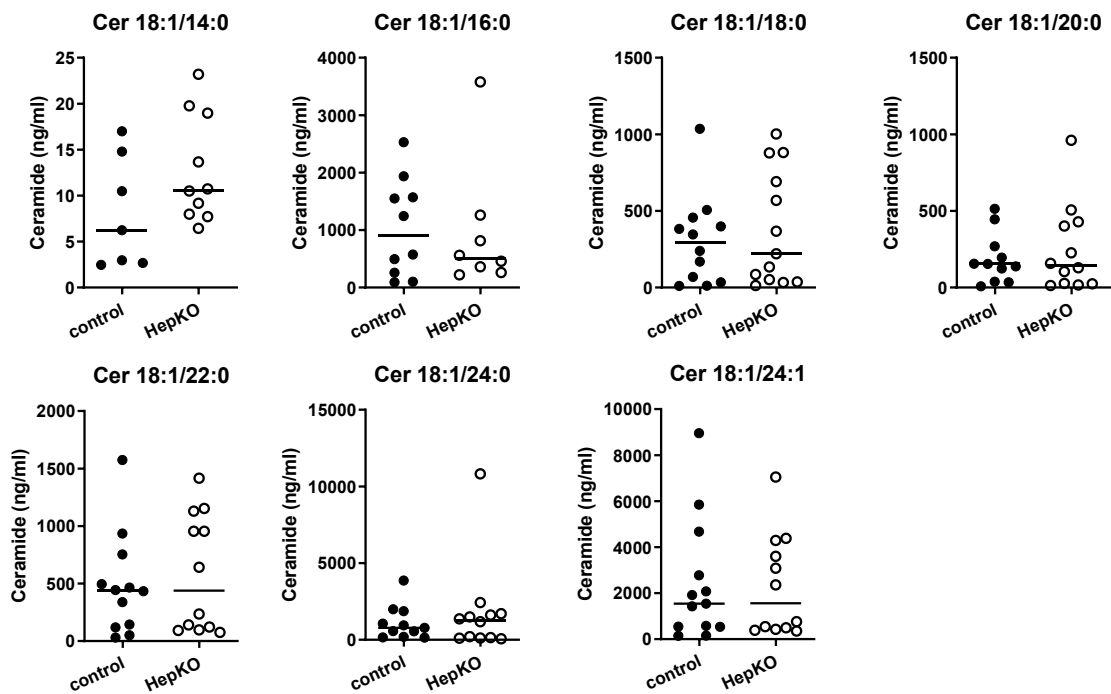

# A: Sterols in liver, 8-month-olds

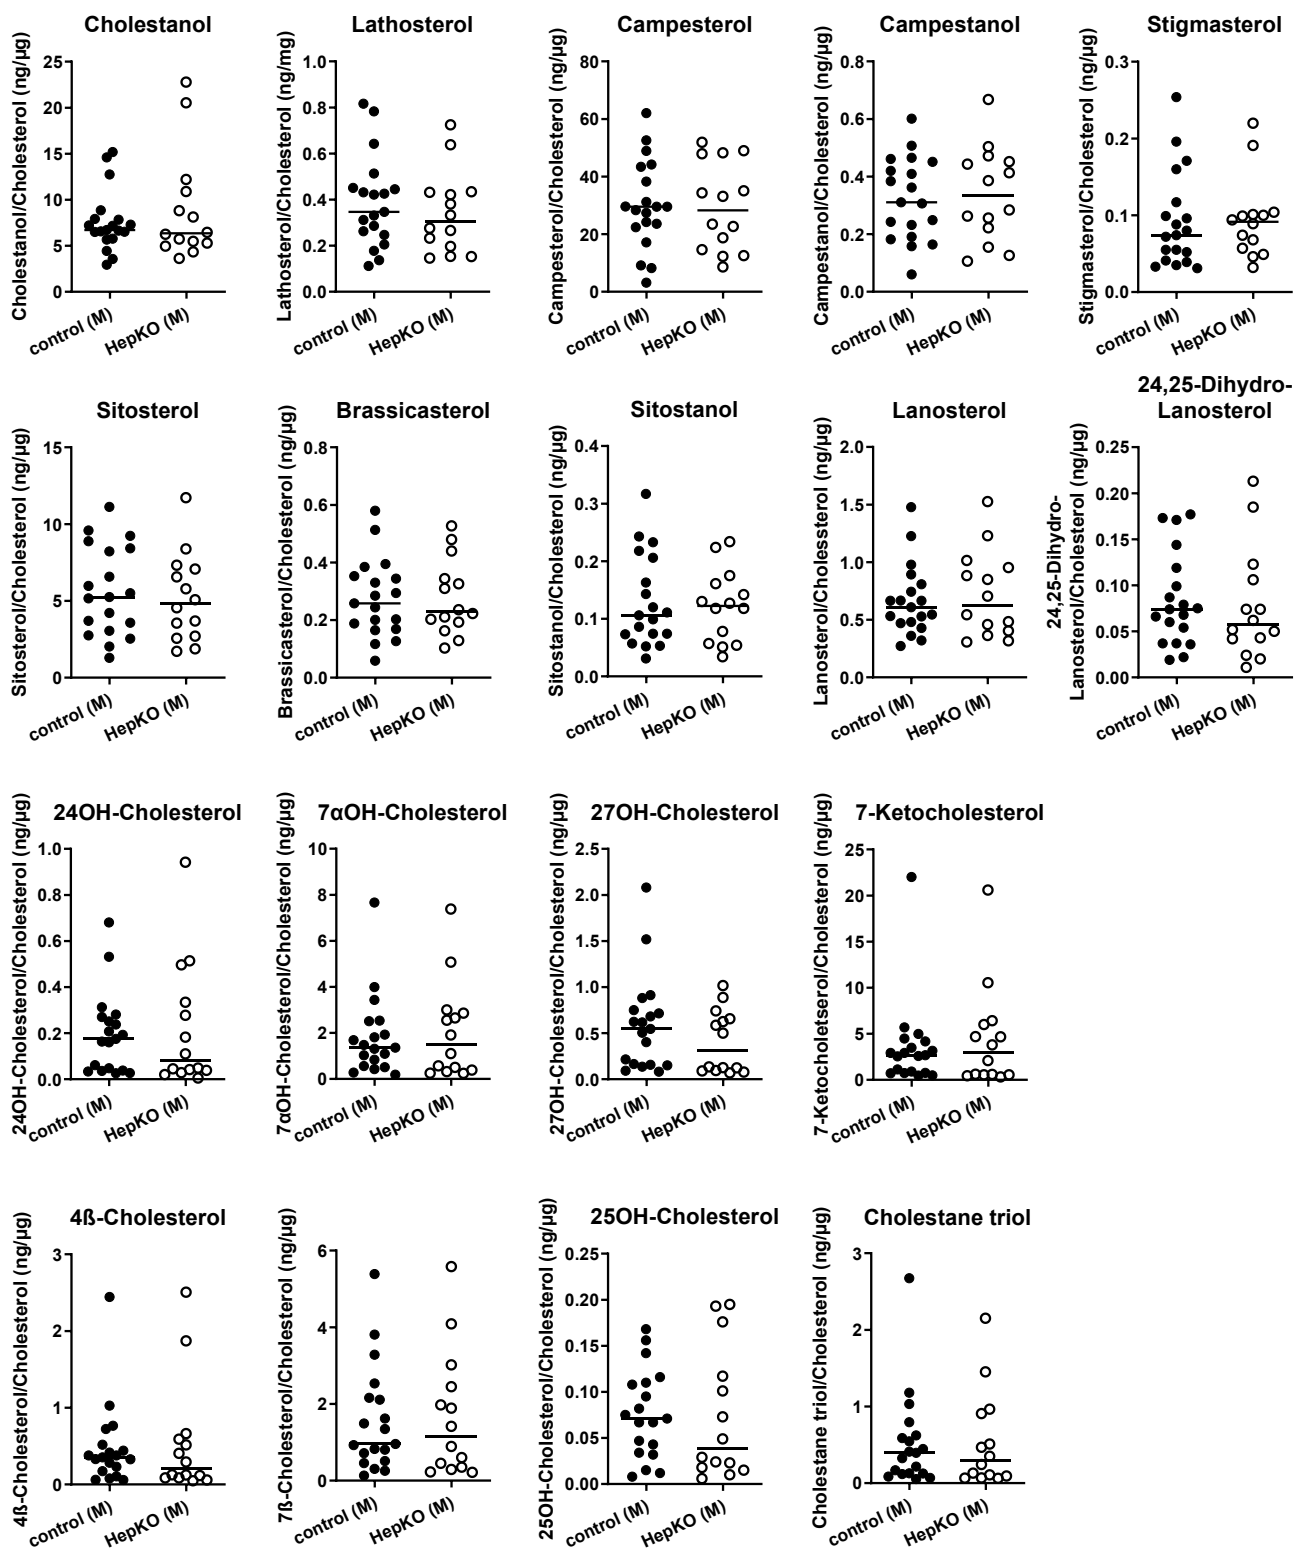

Figure S6

## B: Sterols in plasma, 8-month-olds

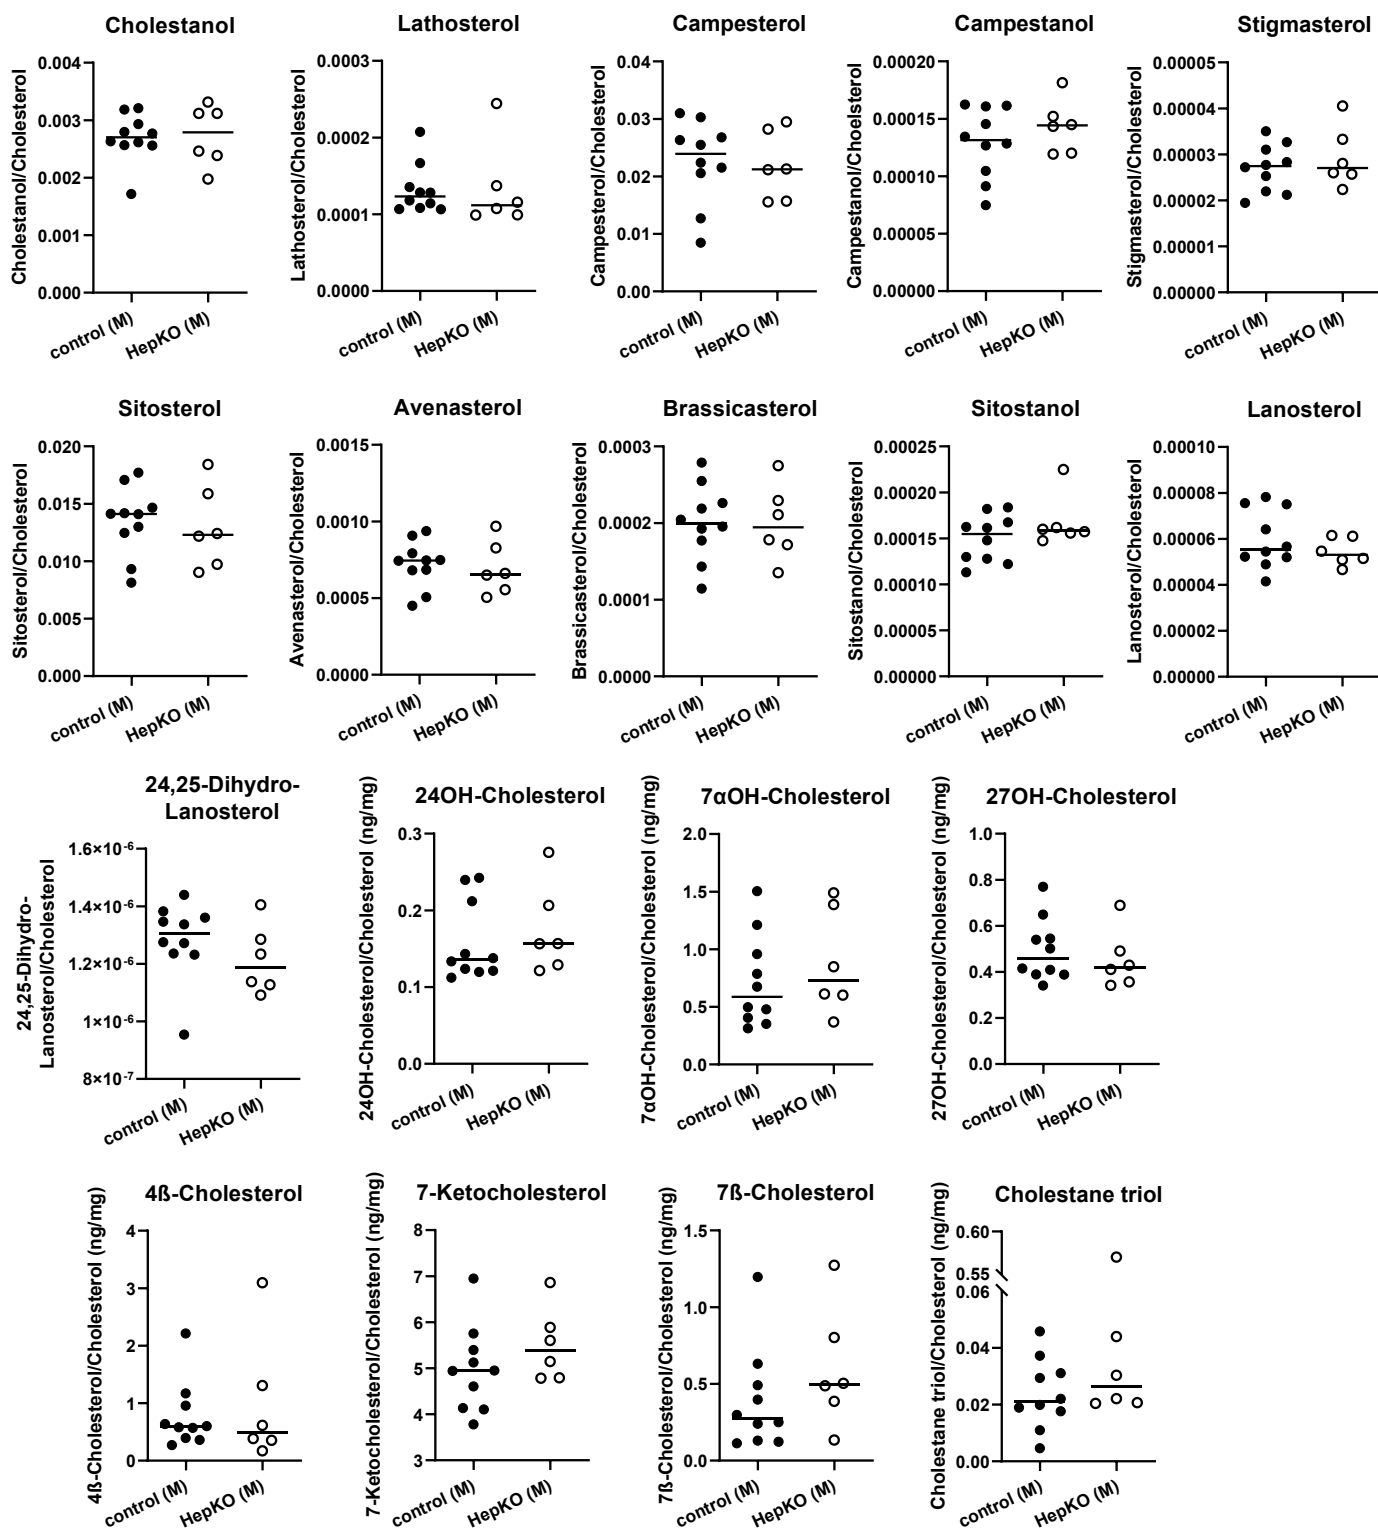

Figure S6 (cont.)
